# Supplementary material for: Enhanced catalytic performance of pillared δ-MnO2 with enlarged layer spaces for lithium– and sodium–oxygen batteries: a theoretical investigation
Source: Royal Society of Chemistry journal article supplement (doi:10.1039/d1nr07407e), 2021-01-01
Supplement: d1nr07407e1.pdf [file d1nr07407e1.pdf]

## Electronic Supporting Information

### **Enhanced catalytic performance of pillared $\delta$ -MnO<sub>2</sub> with enlarged layer spaces for lithium- and sodium-oxygen batteries: A theoretical investigation**

Jia-Hui Li and Yang-Xin Yu\*

*Laboratory of Chemical Engineering Thermodynamics, Department of Chemical Engineering, Tsinghua University, Beijing 100084, P. R. China*

\*Corresponding author. E-mail: yangxyu@mail.tsinghua.edu.cn

Phone: +86-10-62782558

Fax: +86-10-62770304

Table S1 and Figure S1 include the information for C-C bond lengths of various molecules. Figure S2 records the density of states of bare-MnO<sub>2</sub>. Figure S3 is the information for the d-electron states of three pillared structures. Figure S4 is the AIMD simulation configurations of three pillared structures. The configurations of deep reduction product Li<sub>3</sub>O<sub>2</sub> and Li<sub>4</sub>O<sub>2</sub> adsorbed H-MnO<sub>2</sub> are shown in Figure S5 (a) and (b). The configurations of deep reduction product Li<sub>3</sub>O<sub>2</sub>, Li<sub>4</sub>O<sub>2</sub>, Na<sub>3</sub>O<sub>2</sub> and Na<sub>4</sub>O<sub>2</sub> adsorbed Cl-MnO<sub>2</sub> are shown in Figure S5 (c) and (f).

The complete battery reaction including the deep reduction of lithium and sodium is  $X + \text{Sub} \rightarrow X@ \text{Sub} \xrightarrow{+O_2} XO_2@ \text{Sub} \xrightarrow{+X} X_2O_2@ \text{Sub} \xrightarrow{+X} X_3O_2@ \text{Sub} \xrightarrow{+X} X_4O_2@ \text{Sub}$  (X = Li or Na) (S1)

The d-band center ( $E_d$ ) of substrates can be computed by:

$$E_d = \frac{\int \varepsilon \cdot P(\varepsilon) d\varepsilon}{\int P(\varepsilon) d\varepsilon} \quad (\text{S2})$$

where  $\varepsilon$  denotes the energy-level of electrons and  $P(\varepsilon)$  is the number of electrons occupied in energy level  $\varepsilon$ . The upper and lower limits of the integral are selected as electrons below the Fermi level.

**Table S1** The various C-C bond lengths of bare molecules and molecules in pillared systems.

---

C-C bond length (Å)

---

|                     | ①     | ②     | ③     | ④     | ⑤     | ⑥     |
|---------------------|-------|-------|-------|-------|-------|-------|
| $C_6H_4O_6S_2$      | 1.397 | 1.398 | 1.395 | 1.398 | 1.397 | 1.395 |
| H-MnO <sub>2</sub>  | 1.397 | 1.392 | 1.380 | 1.397 | 1.393 | 1.383 |
| $C_6H_3O_6S_2Cl$    | 1.406 | 1.401 | 1.395 | 1.397 | 1.396 | 1.397 |
| Cl-MnO <sub>2</sub> | 1.414 | 1.406 | 1.391 | 1.397 | 1.389 | 1.402 |
| $C_6H_3O_6S_2F$     | 1.399 | 1.398 | 1.396 | 1.396 | 1.397 | 1.389 |
| F-MnO <sub>2</sub>  | 1.405 | 1.402 | 1.391 | 1.398 | 1.392 | 1.391 |

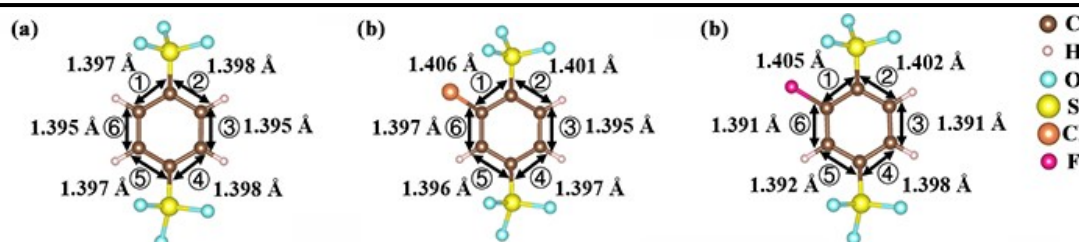

**Fig. S1** The C-C bond lengths of bare anions of (a) 1,4-benzenedisulfonic acid, (b) 2-chloro-1,4-benzenedisulfonic acid, and (c) 2-fluoro-1,4-benzenedisulfonic acid.

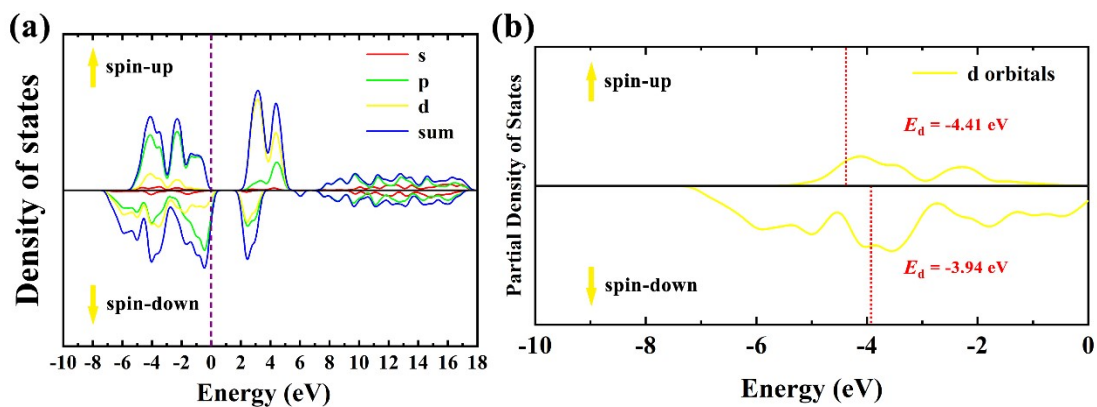

**Fig. S2** (a) The partial density of states of bare-MnO<sub>2</sub> and (b) d-orbital density of states. Both spin-up and spin-down electrons are plotted and their d-band centers are calculated.

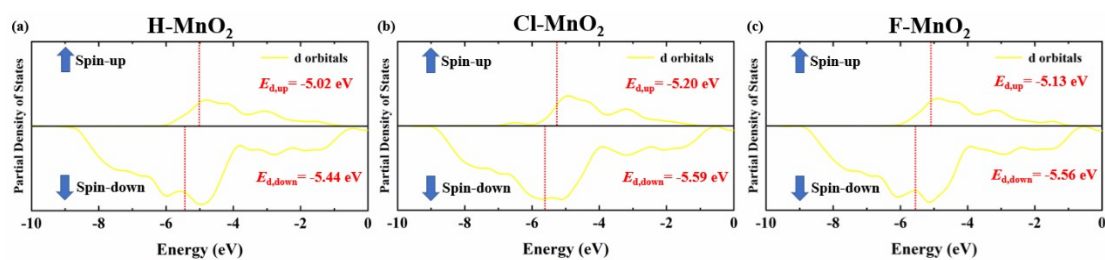

**Fig. S3** The d-orbital density of states and corresponding d-band centers of (a) H-MnO<sub>2</sub>, (b) Cl-MnO<sub>2</sub>, and (c) F-MnO<sub>2</sub> pillared structures. States of both spin-up and spin-down electrons are plotted and their d-band centers are calculated separately.

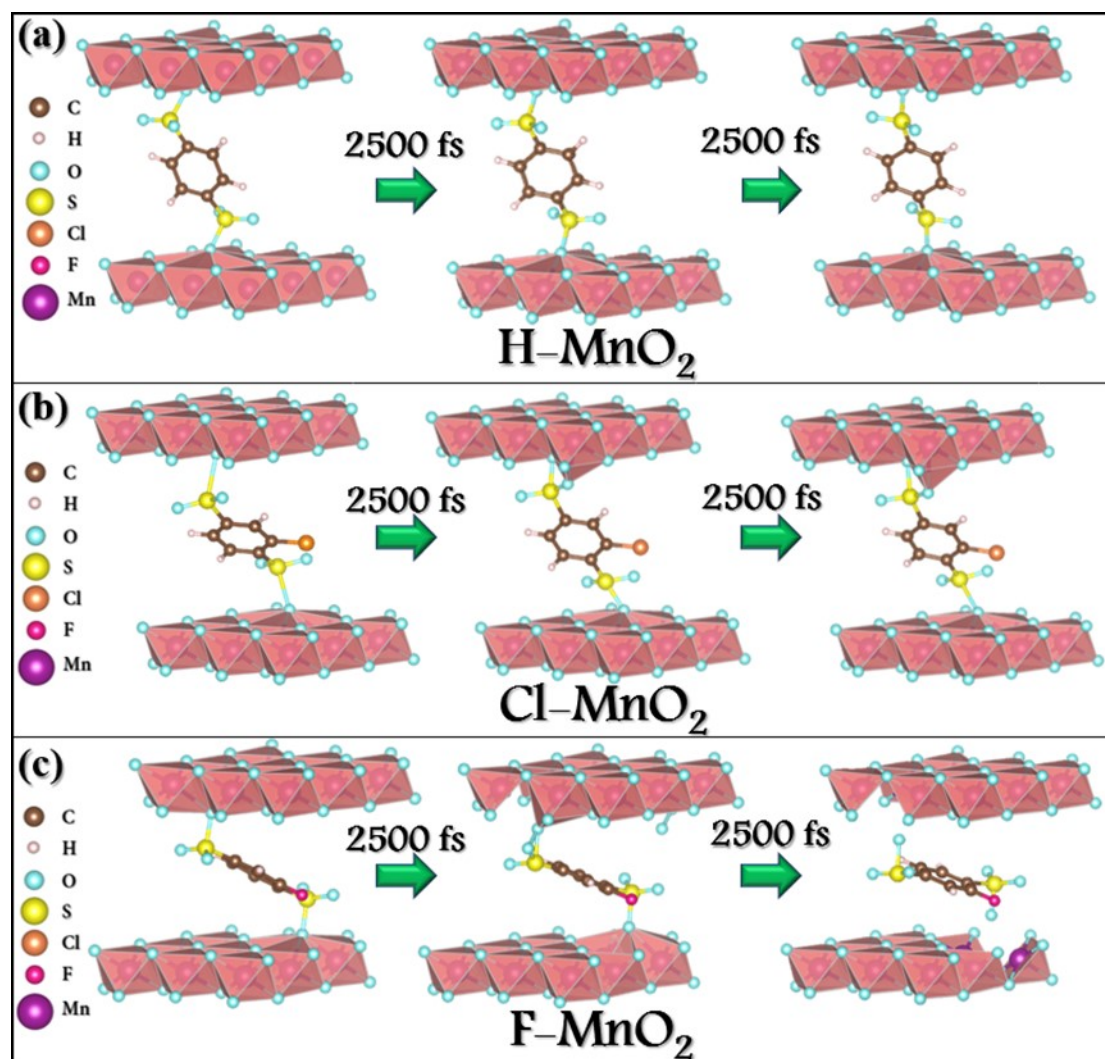

**Fig. S4** The configurations of (a) H-MnO<sub>2</sub>, (b) Cl-MnO<sub>2</sub>, and (c) F-MnO<sub>2</sub>, in the AIMD

simulations at initial stage (0 fs), middle stage (2500 fs), and final stage (5000 fs).

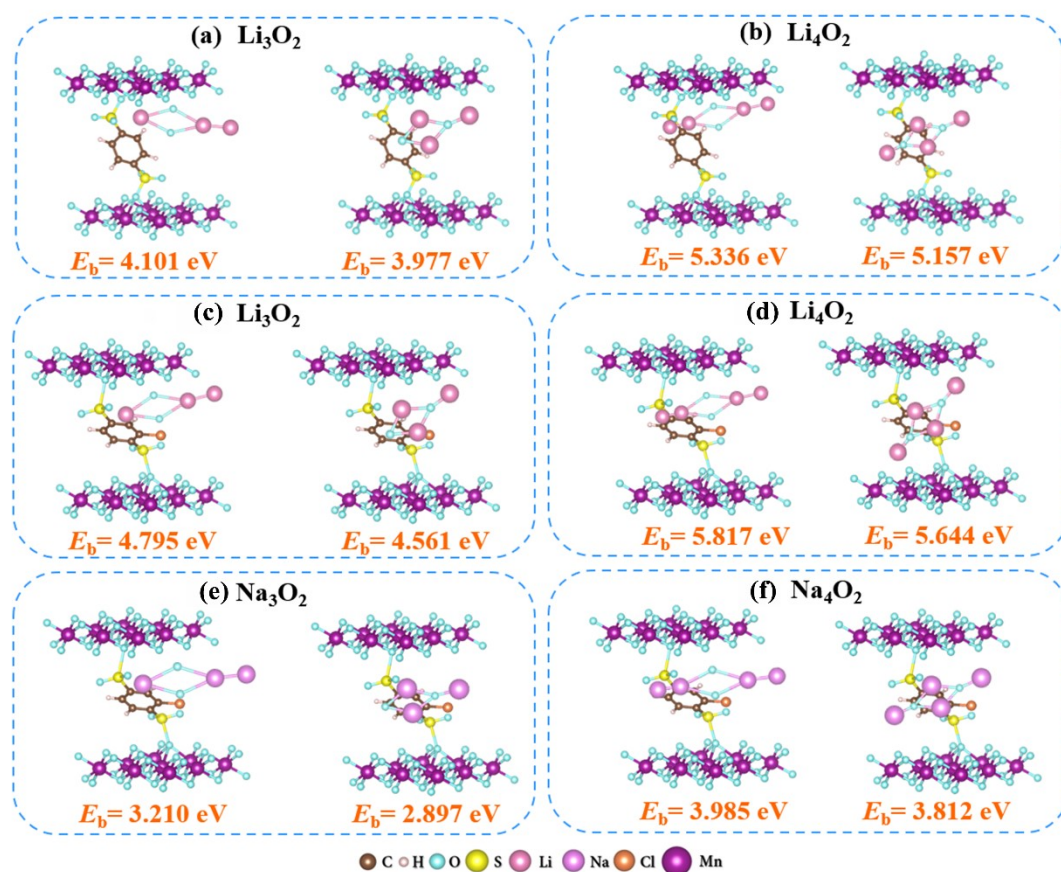

**Fig. S5** The configurations of deep reduction product (a)  $\text{Li}_3\text{O}_2$  and (b)  $\text{Li}_4\text{O}_2$  adsorbed H-MnO<sub>2</sub>.

The configurations of deep reduction product (c)  $\text{Li}_3\text{O}_2$ , (d)  $\text{Li}_4\text{O}_2$ , (e)  $\text{Na}_3\text{O}_2$  and (f)  $\text{Na}_4\text{O}_2$

adsorbed Cl-MnO<sub>2</sub>. In each group, the configuration on the left is more stable than the configuration on the right.
